# Supplementary material
Source: publisher figshare collection journal article supplement (https://acs.figshare.com/ndownloader/files/4017205)
Supplement: Supplementary file 1 [file 4017205]

# Superhydrophilic Multilayer Silica Nanoparticle Networks on Polymer Microchannel using a Spray Layer-by-Layer Nano-Assembly Method

*Kang Kug Lee\* and Chong H. Ahn*

Microsystems and BioMEMS Laboratory

School of Electronics and Computing Systems

University of Cincinnati, Cincinnati, Ohio, 45221, USA.

**\* Corresponding Author:** [Leek8@mail.uc.edu](mailto:Leek8@mail.uc.edu)

## Supporting Information

### The robustness of the spray-assembled silica multilayers in several different conditions

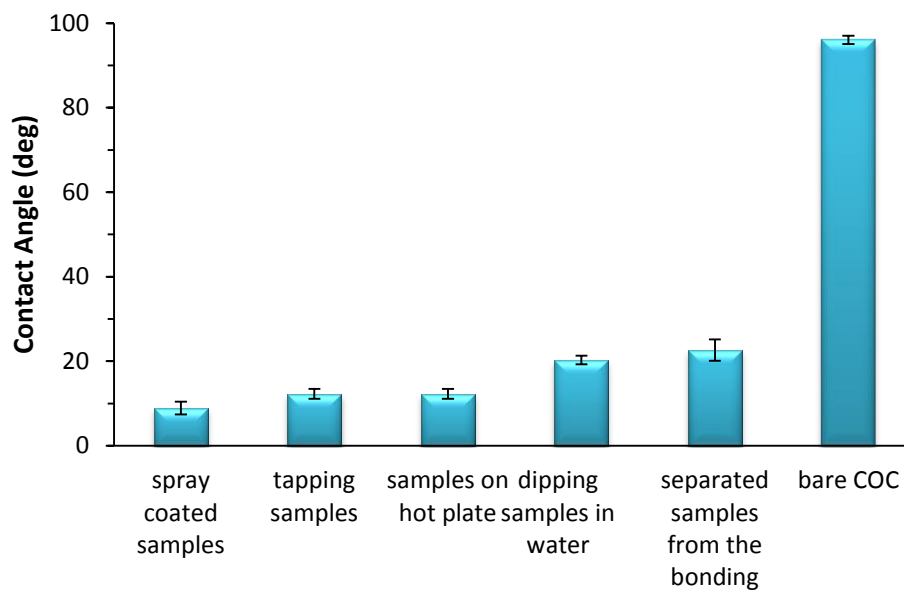

**Figure S1.** Contact angle measurements of five different types of silica multilayer networks on COC substrates with DI water droplets to evaluate the robustness of the films.
